# Supplementary material for: Graphene Oxide Nanoribbons Induce Autophagic Vacuoles in Neuroblastoma Cell Lines
Source: Int J Mol Sci. 2016 Nov 29;17(12):1995. doi: 10.3390/ijms17121995 (PMC5187795; doi:10.3390/ijms17121995)
Supplement: Supplementary file 1 [file ijms-17-01995-s001.pdf]

# Supplementary Materials: Graphene Oxide Nanoribbons Induce Autophagic Vacuoles in Neuroblastoma Cell Lines

Emanuela Mari, Stefania Mardente, Emanuela Morgante, Marco Tafani, Emanuela Lococo, Flavia Fico, Federica Valentini and Alessandra Zicari

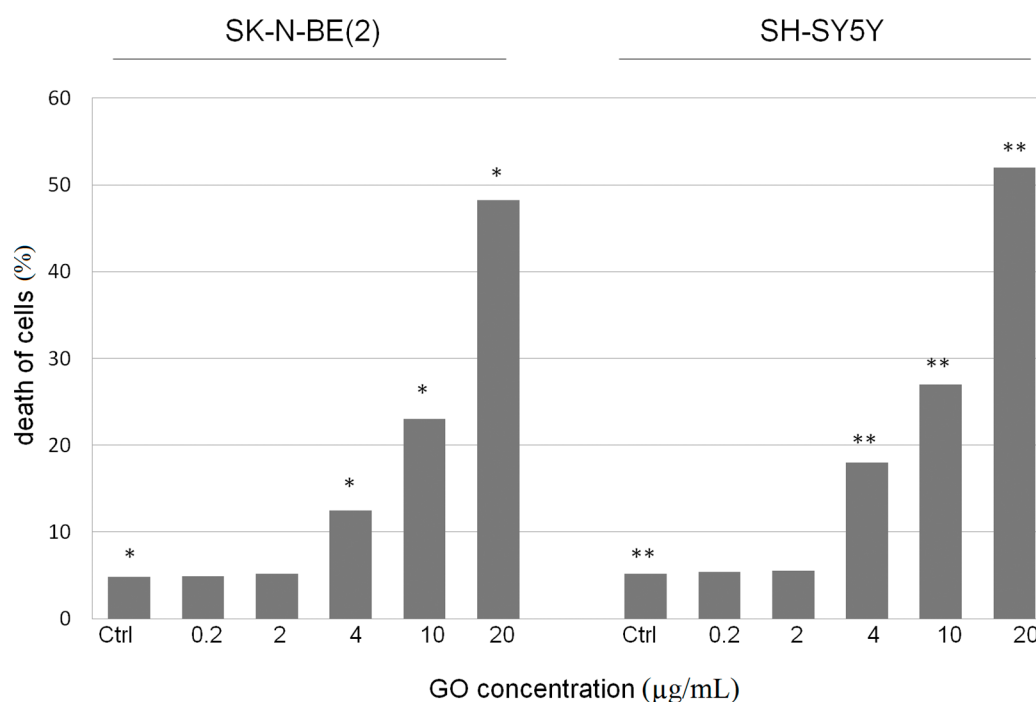

**Figure S1.** Effect of graphene oxide (GO) on the mortality of SK-N-BE(2) and SH-SY5Y cells ( $10^5$ /mL) were exposed to different concentrations of GO for 72 h. There were no significant differences ( $p = 0.8$ ) between the cell lines. Significant differences ( $p = 0.001$ ) are shown between the concentrations compared to control in each cell line (\* SK-N-BE(2) cells; \*\* SH-SY5Y).
